1 Endocrine disrupting chemicals and COVID-19 relationships: a computational systems  
2 biology approach

3

4 Qier Wu<sup>1</sup>, Xavier Coumoul<sup>1</sup>, Philippe Grandjean<sup>2,3</sup>, Robert Barouki<sup>1</sup>, Karine Audouze<sup>1\*</sup>

5

## 6 **Affiliations :**

7 <sup>1</sup> Université de Paris, T3S, Inserm UMR S-1124, F-75006 Paris, France

8 <sup>2</sup> Harvard T.H.Chan School of Public Health, Boston, MA 02215, USA

9 <sup>3</sup> University of Southern Denmark, 5000 Odense C, Denmark

10 \* Corresponding author: karine.audouze@u-paris.fr\_tel: + 33 142 864 010, Université de  
11 Paris, T3S, Inserm UMR-S 1124, 45 rue des Saints-Pères- F-75006 Paris, France

12

## 13 **Abstract**

14 Background: Patients at high risk of severe forms of COVID-19 frequently suffer from chronic  
15 diseases, but other risk factors may also play a role. Environmental stressors, such as  
16 endocrine disrupting chemicals (EDCs), can contribute to certain chronic diseases and might  
17 aggravate the course of COVID-19.

18 Objectives: To explore putative links between EDCs and COVID-19 severity, an integrative  
19 systems biology approach was constructed and applied.

20 Methods: As a first step, relevant data sets were compiled from major data sources.

21 Biological associations of major EDCs to proteins were extracted from the CompTox  
22 database. Associations between proteins and diseases known as important COVID-19  
23 comorbidities were obtained from the GeneCards and DisGeNET databases. Based on these  
24 data, we developed a tripartite network (EDCs-proteins-diseases) and used it to identify  
25 proteins overlapping between the EDCs and the diseases. Signaling pathways for common  
26 proteins were then investigated by over-representation analysis.

27 Results: We found several statistically significant pathways that may be dysregulated by  
28 EDCs and that may also be involved in COVID-19 severity. The Th17 and the AGE/RAGE  
29 signaling pathways were particularly promising.

30

31

32 Conclusions: Pathways were identified as possible targets of EDCs and as contributors to  
 33 COVID-19 severity, thereby highlighting possible links between exposure to environmental  
 34 chemicals and disease development. This study also documents the application of  
 35 computational systems biology methods as a relevant approach to increase the  
 36 understanding of molecular mechanisms linking EDCs and human diseases, thereby  
 37 contributing to toxicology prediction.

38

39 **Keywords:** endocrine disruptor, systems toxicology, integrative computational approach,  
 40 network science, OBERON

## 41 Introduction

42 The COVID-19 pandemic started in the fall of 2019 and spread to a large part of the  
43 world during the winter and spring of 2020. By late June 2020, it had led to more than  
44 500,000 deaths, of which one-fourth in the US and about 175,000 in the EU  
45 (<https://coronavirus.jhu.edu/map.html>, <https://covid19.who.int/>). Despite considerable  
46 research activities, there are still many unknowns concerning this infectious disease,  
47 especially with regard to the substantial variability of the disease severity. Following an  
48 initial infectious phase, a “cytokine storm”, leading to pneumonia is observed in severe cases  
49 which may require intensive care. It is still unclear why infections lead to severe cases in  
50 some patients and not in others, but both endogenous and exogenous factors can likely  
51 influence the outcome of the disease.

52 In addition to older age and male sex, several comorbidities are associated with  
53 severe COVID-19 and increased mortality risk. Disorders such as cardiovascular disease, type  
54 II diabetes (T2D), obesity, chronic respiratory disease or hypertension are strongly linked to  
55 severe COVID-19 cases (Petrilli et al. 2020)(Zhou et al. 2020)(Stefan et al. 2020). As has  
56 recently been proposed, underlying metabolic and endocrine dysfunctions may be  
57 mechanistically linked to the exacerbation of the coronavirus infection (Bornstein et al.  
58 2020), and these observations may inspire new insight into the pathogenesis of this disease,  
59 including biological interpretation of the mechanisms involved. Environmental stressors  
60 have already been suggested to contribute to the severity of the disease (Bashir et al. 2020;  
61 Fattorini and Regoli 2020; Zhu et al. 2020), but little mechanistic support for this association  
62 is available. A relevant approach would be to compare the biological pathways triggered by  
63 environmental stressors with those involved in the COVID-19 severity. If similar pathways  
64 are found, this would increase the likelihood that such stressors may contribute to critical  
65 stages of this disease.

66 Given the suspected hormonal mode of vulnerability (Drucker 2020) endocrine  
67 disrupting chemicals (EDCs) could represent important triggers of aggravated infection, e.g.,  
68 in the form of phthalates, bisphenols, organochlorine pesticides, and perfluorinated alkane  
69 substances (PFASs) (Trasande et al. 2016; Vandenberg et al. 2016). Exposure to these  
70 substances may affect the immune defense, thus potentially increasing the susceptibility to  
71 develop COVID-19 (Tsatsakis et al. 2020), as supported by experimental studies(Cipelli et al.  
72 2014; Couleau et al. 2015). For example, epidemiological evidence on children exposed to

73 PFASs show decreased immune responses to routine vaccines (Grandjean et al. 2012) and a  
74 greater risk of developing infectious disease(Dalsager et al. 2016; Granum et al. 2013).

75 As promising tools to gain better insight into the possible risk factors and  
76 mechanisms, toxicological and chemical data sources have expanded substantially, thereby  
77 enabling network science and computational systems biology methods to become feasible  
78 (Audouze et al. 2013, 2018; Taboureau and Audouze 2017; Vermeulen et al. 2020; Wu et al.  
79 2020). We have therefore conducted an integrative systems biology exploration to identify  
80 overlapping proteins that are both dysregulated by EDCs and involved in comorbidities  
81 associated with aggravated COVID-19. Based on this tripartite network, integrating protein-  
82 EDC associations and protein-disease annotations, we then performed biological  
83 enrichments of pathways to detect the most plausible relationships between EDC exposure  
84 and COVID-19 severity.

85

86

## 87 **Methods**

88 We employed a computational systems biology approach to explore putative linkages  
89 between EDCs and COVID-19 as presented in Figure 1. First, a tripartite network was created  
90 based on known associations between proteins and either COVID-19 comorbidities or EDCs,  
91 as compiled from existing databases (CompTox, DisGeNET, GeneCards) (A). Then, biological  
92 enrichment was performed with the jointly identified proteins (i.e., those retrieved in both  
93 association studies) (B) by over-representation analysis (ORA) to identify the pathways that  
94 were the highly linked to both the diseases and the EDCs (C). As a final step, the biological  
95 pathways were explored with available knowledge regarding COVID-19 mechanisms (from  
96 the literature and the AOP-Wiki database), thereby allowing consideration of hypothetical  
97 linkages between EDCs and COVID-19 (D).

### 98 ***Endocrine-disrupting chemical dataset***

99 A list of 34 commonly used substances known or suspected to act as EDCs was established,  
100 based on knowledge from three data sources: the endocrine disruptor assessment list from  
101 ECHA (<https://echa.europa.eu/fr/ed-assessment>, as of April 24, 2020), the one from NIEHS  
102 (<https://www.niehs.nih.gov/health/topics/agents/endocrine/index.cfm> as of April 28, 2020),  
103 and the TEDX database ([https://endocrinedisruption.org/interactive-tools/tedx-list-of-](https://endocrinedisruption.org/interactive-tools/tedx-list-of-potential-endocrine-disruptors/search-the-tedx-list)  
104 [potential-endocrine-disruptors/search-the-tedx-list](https://endocrinedisruption.org/interactive-tools/tedx-list-of-potential-endocrine-disruptors/search-the-tedx-list), as of April 24, 2020).

105 To explore as much as possible the chemical diversities, EDCs for this study were further  
106 selected to represent different chemical classes (Table 1). The CAS numbers were used for  
107 data integration.

### 108 ***Disease dataset***

109 Comorbidities known to be associated with obesity or otherwise leading to severe COVID-19  
110 were extracted from a recent study (Stefan et al. 2020), and resulted in a total of 13  
111 disorders for exploration in the integrative systems toxicology (Table2).

### 112 ***Endocrine-disrupting chemical-protein associations***

113 Human proteins known to be associated with each of the 34 EDCs were extracted from the  
114 U.S. Environmental Protection Agency web-based CompTox Chemistry dashboard, which  
115 contains a wide range of data related to chemical toxicity, including *in vitro* bioassays data  
116 (as of April 30, 2020) (Williams et al. 2017). Each linked protein was matched to a gene  
117 symbol and classified using the Panther (protein analysis through evolutionary relationships)  
118 classification system (version 15, released February 14, 2020) (Mi et al. 2013), a curated

biological database of gene/protein families, and their functionally related subfamilies that can be used to classify and identify the function of gene products.

### ***Disease-protein associations***

From two human protein-disease databases, proteins known to be linked to the 13 studied diseases were listed (as of April 29, 2020 for both data sources). The DisGenNet database is a discovery platform containing one of the largest publicly available collections of genes and variants associated with human diseases (Piñero et al. 2015). The GeneCards database contains manually curated information for substances and their associations to genes and proteins, that are scored (Safran et al. 2010). For the present study, only associations were kept only for those between human diseases and proteins categorized as coding proteins, and all non-human information, including gene clusters, genetic locus, pseudogenes, RNA genes and those uncategorized were disregarded. All listed proteins were matched to their gene symbol to facilitate further analysis. Each identified protein from both databases, was categorized into the protein class using the Panther classification (version 15).

### ***Pathways enrichment analysis***

To decipher biological pathways potentially linked to the selected EDCs and explore if they might overlap with the ones known for COVID-19, an ORA was done. Four major sources of protein-pathway information were independently integrated, i.e., using the Kyoto Encyclopedia of Genes and Genomes (KEGG), the Reactome, the Wiki-pathways and the Panther databases (Fabregat et al. 2018; Kanehisa et al. 2019; Mi et al. 2013; Slenter et al. 2018). To assess the statistical significance of the protein-pathway relationships, a hypergeometric test was used for each of the four sources, followed by a multiple testing correction of the *p*-values with the Benjamini-Hochberg method. The ORA was performed on the common proteins identified to identify the most strongly linked proteins that are affected by the EDCs and also associated with at least one the 13 comorbidities. As a last step, manual curation allowed us to consider relevant outcomes for interpretation. The four data sources provided complementary information, with some overlapping findings.

### ***COVID-19 and biological mechanism of action***

Linkage between COVID-19 and potential biological targets and affected pathways were extracted from the literature (as of May 22, 2020) and the AOP-Wiki database (as of May 22, 2020).

## Results

### *Endocrine-disrupting chemical-protein associations*

From the CompTox database, information on the links between chemicals and human proteins were compiled. Data for 30 of the 34 chemicals could be retrieved, and a total of 208 unique human proteins were involved via 1632 associations. No information was retrieved for hexachlorobenzene, nonylphenol ethoxylate, perchlorate and tributyltin. Perfluorooctane sulfonic acid (PFOS) targeted the highest number of proteins (113), and 2,2',4,4',5,5'-hexachlorobiphenyl (PCB 153) was associated with only one biological target (the progesterone receptor). The most frequently affected proteins included the androgen receptor (AR) and the estrogen receptor-alpha (ESR1), which were each linked to 23 EDCs, whereas 61 individual proteins were associated with only one EDC.

To identify the biological targets that are most often affected by EDCs, proteins were grouped in clusters according to their families, as based on the Panther classification system (Figure 2). The majority of the 208 proteins related to EDCs belonged to 12 classes among the 23 present in Panther, while the remaining proteins were classified as 'uncategorized protein class'. Each protein was assigned to only one category, although only one of them, HLA-DRA, (HLA class II histocompatibility antigen, DR alpha chain) belonged to the defense/immunity group. Other immunity-related proteins, such as interleukin 6 (IL-6) or interleukin 1 alpha (IL-1A), were not associated with any class in the Panther classification. We therefore manually added all immune system-related proteins to the "uncategorized class". Given that Bisphenol A (BPA) increases the release of these proteins (Ben-Jonathan et al. 2009), and because antibodies to the IL-6 receptor (such as tocilizumab) or to the IL-1 receptor (such as Anakinra) are currently tested for the treatment of COVID-19 patients (Zhou et al. 2020), we also explored if the proteins selected could be mapped to defense and/or immunity biological categories. For this purpose, we used the Gene Ontology (GO) classification (as of May 26, 2020), and among the 208 proteins dysregulated by EDCs, 58 were associated with inflammatory response, 75 with defense response, and 66 with regulation of immune system process.

### *Disease-protein associations*

Regarding diseases associated with human proteins, two databases were screened. From the DisGeNET database, we were able to retrieve information for 8 of the 13 diseases, which were connected to 3262 unique proteins via 7195 links (as of April 29, 2020). The proteins

were categorized in 22 protein classes using the Panther classification (version 15) (Figure S1). Proteins that did not belong in any class were again grouped into the uncategorized class. Obesity and diabetes were linked to proteins belonging to each of the 22 categories, whereas insulin resistance and dyslipidemia were linked to only half of the categories. From the GeneCards database, all 13 predisposing diseases were retrieved (as of 29 April 2020), and a total of 115,289 associations were identified between the diseases and 29,094 unique human proteins were extracted. Among them, only protein-coding information according to HGNC, Ensembl or Entrez Gene were kept (proteins data related to biological regions, gene clusters, genetic loci, pseudogenes, non-coding RNA genes and uncategorized elements were not considered), thereby reducing the total number of unique protein to 18,931, representing 97,855 disease-protein links. As a next step, grouping of the proteins using the Panther classification system allowed identification of 23 clusters correspond to the 23 different protein classes (Figure S2). Each protein was assigned to only one category, except for ameloblastin (AMBN), which was associated with both 'extracellular matrix protein' and 'structural protein'. Proteins not associated with Panther classes, were again grouped into the uncategorized class. Excluding the viral or transposable element protein class, all diseases (except dyslipidemia) were associated with all the other Panther classes. In order to keep the most relevant protein-disease associations obtained from the GeneCards database, data were filtered based on their scores. The GeneCards scores are calculated based on publications mentioning a protein and a disease, using a Boolean model. The higher the score, the more relevant the protein-disease association is. Among the 97,855 links between the 13 diseases and 18,931 proteins, the score values ranged between 0.13 (representing very low association) to 228 (very high evidence for a protein-disease connection). After evaluation of the extracted data (number of proteins by GeneCards scores), we selected associations with a score  $\geq 20$  (see Figure S3). Within this threshold, a total of 5732 associations were retained that link the 12 diseases with 2079 unique human proteins (no information was retained for 'dyslipidemias' from the GeneCards database).

### ***Generating a tripartite network of protein-EDC-disease associations***

A human bipartite associative network of proteins and the 13 diseases was created. Among the 3262 unique proteins from the DisGeNET, and the 2079 proteins from the GeneCards databases, 1157 were overlapping proteins and only 922 and 2105 proteins were uniquely associated with GeneCards or DisGeNET, respectively. All 4184 unique proteins were again



grouped into 23 clusters using the Panther classification (the class ‘viral or transposable element protein’ was not kept after the cleaning step. Among the groupings, we retrieved a cluster of proteins linked to the ‘defense/immunity’ category. These results were merged with the bipartite protein-EDCs network to develop a tripartite network (Figure 2).

### ***Translation into pathways***

To identify biological pathways that may be involved in the predisposing diseases while also being dysregulated by the EDCs, we first analyzed the overlaps between the two sets of proteins. Among the proteins identified from the three data sources, 98 were common (Figure S4), and all of them were mapped to unique Entrez GeneID, and could therefore be used for biological enrichment analyses, which were performed independently using four data sources (KEGG, Reactome, Wiki-pathways and Panther). The ORA analysis revealed several statistically significant pathways linked to interleukins/cytokines signaling, intracellular signaling pathways and, regulation of metabolic pathways (Table 3). Interestingly, the different data sources showed very significant associations with common pathways, such as interleukins (IL) related pathways: IL-4 and IL-13, IL-10 signaling pathways ( $p_{adj} < E-16$ , and  $p_{adj}$  of  $2.85E-09$  respectively, Reactome), IL-17 signaling pathway ( $p_{adj}$  of  $1.05E-10$ , KEGG), IL-3, IL-5 and IL-18 signaling pathways ( $p_{adj}$  of  $1.09E-09$ ,  $2.52E-09$ ,  $1.49E-08$  respectively, Wiki-pathways), the IL-signaling pathways ( $p_{adj}$  of  $1.10E-05$ , Panther); or the Toll-like receptor signaling pathway ( $p_{adj}$   $3.91E-09$  for KEGG,  $p_{adj}$  of  $0.99$  for Panther and  $p_{adj}$   $1.93E-08$  for Wiki-pathways).

Among the most significant pathways, several were retrieved from each of the data sources with relation to the AGE/RAGE pathway (*i.e.* Advanced Glycation End products and its receptor), which is known to cause cellular stress and inflammation. The AGE are formed non-enzymatically, by Maillard reaction products (carbohydrates with proteins and/or lipids) and bind to the RAGE. Formation of AGE has been associated with chronic diseases such as type 2 diabetes (Cai et al. 2012; Menini et al. 2018). Similarly, the stress or inflammatory pathways (e.g shear stress, defined as the tangential force exerted by the blood flow on the vascular endothelium, TNF-alpha) are highlighted by our analysis; the shear stress activates the AhR signaling pathway, which is also involved in the regulation of IL-17 production by the Th17 lymphocytes; interleukin 17 has been suspected to be involved in the pathogenesis of COVID19 (Gutiérrez-Vázquez and Quintana 2018; Han et al. 2008; Pacha et al. 2020). Interestingly, inflammation is suspected to influence insulin resistance.

## 247 ***Exploration of EDCs linkage to COVID-19***

248 To explore putative links between COVID-19 and exposure to EDCs, we first screened the  
249 AOP-Wiki database, and then further examined the pathways identified using literature  
250 references.

251 In the AOP-Wiki database, only one AOP was related to COVID-19, and it involves several key  
252 events, such as ‘increased pro-inflammatory mediators’ (KE 1496), ‘increased inflammatory  
253 immune responses’ (KE 1750), which leads to the adverse outcome ‘increased mortality’ (AO  
254 351). Such knowledge-based linear chain of events highlights the importance of the link  
255 between COVID-19 and inflammatory processes.

256

257

## Discussion

In order to investigate possible links between exposure to EDCs and the severity of COVID-19, we explored a computational systems biology approach. The tripartite network model first linked EDCs to targeted proteins and then proteins related to diseases that predispose to more serious COVID-19 development, thereby allowing us to identify common signaling pathways. The identification of such joint pathways and their role as possible targets of EDCs highlights the potential links between exposure to environmental chemicals and COVID-19 severity.

This integrative approach can be easily applied as a new approach methodology (NAM) (Bopp et al. 2019), which may offer support to methods alternative to animal testing or to identify biological pathways that require more focused laboratory study. Previous studies have demonstrated that systems chemical toxicology models combined with computational network biology may help in understanding chemical toxicity in humans (Hartung et al. 2017; Nie et al. 2015; Taboureau and Audouze 2017). Our tripartite network supports the notion that exposure to EDCs may contribute to aggravation of COVID-19. Although major links were identified at extremely low p values, the approach relies on existing information available in within the very substantive data sources, but some causal associations may have been overlooked or disregarded because of missing or incomplete information.

To assess the validity of our approach, a more focused expert analysis was attempted, where we selected the Th17 and the AGE/RAGE signaling pathways because of their pathophysiological relevance in the context of COVID-19. The interleukin-17 (IL-17) signaling pathway plays several important roles, and IL-17 is produced by a pro-inflammatory subtype of T helper lymphocytes named Th17 cells, located at mucosal barriers where they contribute to pathogen clearance. The IL-17 produced stimulates the synthesis of cytokines (IL1 $\beta$ , TNF-alpha...) and chemokines (MCP-1...) by other cell types, thereby favoring the recruitment of monocytes and neutrophils at inflammatory sites. However, an over-activation of Th17 cells can lead to a hyper-inflammatory state which is deleterious (Pacha et al. 2020).

The highly variable symptomatology associated with the infection by SARS-CoV-2 depends on the levels of IL-17 and of other cytokines including IL-1 $\beta$ , IL-6, IL-15, TNF-alpha and IFN $\gamma$ . The most deleterious effect of SARS-CoV-2 in humans is an acute lung injury leading to a severe acute respiratory syndrome (SARS) that is partly due to IL-17-related excessive

recruitment of pro-inflammatory cells and production of pro-inflammatory cytokines.

Therefore, an increased basal level of IL-17 (in the absence of infection, for example due to obesity or to induction by a chemical) might represent a lung injury risk associated with SARS-CoV-2 infection. Our finding of EDC linkage to this pathway is therefore of high pathogenetic relevance.

Obesity promotes a high basal level of inflammation which contributes to insulin resistance and type 2 diabetes (Goldberg 2009). This phenomenon is due to an infiltration of the adipose tissue (AT) by macrophages and T cells and their production of various pro-inflammatory cytokines, including IL-1 $\beta$ , TNF- $\alpha$ , IL-17 and IL-6. Several EDCs are suspected to be obesogenic (and are subsequently named obesogens). This has been demonstrated for several substances (e.g. tributyltin) and linked to the stimulation of pro-adipogenic signaling pathway (e.g. through PPAR $\gamma$ ) (Egusquiza and Blumberg 2020). Similarly, the aryl hydrocarbon receptor (AhR) is highly expressed in Th17 cells and is an essential contributor to the production of IL-17 (Veldhoen et al. 2008). The AhR, known as the receptor of dioxins and dioxin-like PCBs, is also activated by shear stress (SS), another pathway highlighted in our computational analysis. Indeed, several studies have shown using various endothelial models that laminar SS leads to the activation of two target genes of the AhR, namely CYP1A1 and CYP1B1 (Conway et al. 2009). Two recent studies suggest an indirect link between SARS-CoV-2 and SS by showing that the expression of ACE2 (angiotensin-converting enzyme 2), the receptor of the virus, is increased by SS (Song et al. 2020).

These observations support a dual impact of EDCs on IL-17 production and inflammatory state; this impact could be indirect due to the effect of these chemicals on obesity or through a direct stimulation of several signaling pathways, such as AhR or PPAR $\gamma$ , leading to an overproduction of systemic IL-17; the shear stress pathway represents an additional link between AhR activation and the EDC/disease connection. The implication of shear stress also suggests a possible contribution of increased expression of ACE2, the receptor of the SARS-CoV-2. While the role of these pathways at the nexus between exposure to EDCs and COVID-19 severity appears to be relevant, their actual contribution remains to be demonstrated and their putative role as therapeutic targets remains to be further substantiated.

Our integrative systems biology study also indicates a strong statistical association between the AGE/RAGE signaling pathway, chronic diseases and EDC effects. This is likely due to the well-known links between this pathway and type 2 diabetes(Ravichandran et al. 2019). Indeed, hyperglycemia leads to increased amounts of glycation products and their metabolites which results in the activation of the RAGE receptors. The latter are highly expressed in endothelial cells, and their activation leads to increased oxidative stress and inflammation and ultimately to endothelial damage, thrombotic disorders and vascular diseases (Egaña-Gorroño et al. 2020). Other endogenous ligands can also activate RAGE, among them HMGB1 (high-mobility group box 1), an extra-cellular protein also linked to a variety of inflammatory responses(Andersson et al. 2020). Interestingly, the AGE/RAGE signaling pathway is highly expressed in the lung vasculature and has been implicated in several pulmonary diseases(Oczypok et al. 2017). All these observations support the implication of the AGE/RAGE signaling pathway in vascular, thrombotic and lung diseases which are the hallmarks of COVID-19 severity. Interestingly, there are also complex connections between HMGB1 and ACE2 which is the receptor for SARS-Cov2 and other coronaviruses(Luft 2016). These results are in accordance with recent proposals in published commentaries of environmental chemical impacts on COVID-19 progress(Andersson et al. 2020; Rojas et al. 2020).

The three-way approach did not attempt to identify direct immunotoxic effects due to environmental chemicals otherwise considered to be EDCs. However, some of the EDCs selected, i.e., PCB-153, PFOA and PFOS, are known to have immunotoxic properties (Heilmann et al.), and the same is true for some common air pollutants (Tsatsakis et al. 2020). Accordingly, the impact of environmental chemicals on COVID-19 severity demands attention.

## Conclusions

The results of this computational study appear as a promising initial step toward systematically linking a major group of environmental chemicals to the severity of COVID-19, although the findings need to be further supported by high-throughput screening tests, clinical and experimental data. Nevertheless, these observations bridge environmental stressors and infectious diseases and support an integrated exposome approach. Preliminary

focus on the AGE/RAGE and IL-17 pathways illustrates the potential connection between exposure to EDCs and diseases predisposing to COVID-19 severity.

## Acknowledgments

The authors would like to acknowledge OBERON (<https://oberon-4eu.com/>), a project funded by the European Union's Horizon 2020 research and innovation program under grant agreement no. 825712. This work was also supported by the University of Paris and INSERM. PG is supported by the National Institute of Environmental Health Sciences, NIH (P42ES027706)

## References

- Andersson U, Ottestad W, Tracey KJ. 2020. Extracellular HMGB1: a therapeutic target in severe pulmonary inflammation including COVID-19? *Mol Med Camb Mass* 26:42; doi:10.1186/s10020-020-00172-4.
- Audouze K, Brunak S, Grandjean P. 2013. A computational approach to chemical etiologies of diabetes. *Sci Rep* 3:2712; doi:10.1038/srep02712.
- Audouze K, Taboureau O, Grandjean P. 2018. A systems biology approach to predictive developmental neurotoxicity of a larvicide used in the prevention of Zika virus transmission. *Toxicol Appl Pharmacol* 354:56–63; doi:10.1016/j.taap.2018.02.014.
- Bashir MF, Ma BJ, Bilal null, Komal B, Bashir MA, Farooq TH, et al. 2020. Correlation between environmental pollution indicators and COVID-19 pandemic: A brief study in Californian context. *Environ Res* 187:109652; doi:10.1016/j.envres.2020.109652.
- Ben-Jonathan N, Hugo ER, Brandebourg TD. 2009. Effects of bisphenol A on adipokine release from human adipose tissue: Implications for the metabolic syndrome. *Mol Cell Endocrinol* 304:49–54; doi:10.1016/j.mce.2009.02.022.
- Bopp SK, Kienzler A, Richarz A-N, van der Linden SC, Paini A, Parissis N, et al. 2019. Regulatory assessment and risk management of chemical mixtures: challenges and ways forward. *Crit Rev Toxicol* 49:174–189; doi:10.1080/10408444.2019.1579169.
- Bornstein SR, Dalan R, Hopkins D, Mingrone G, Boehm BO. 2020. Endocrine and metabolic link to coronavirus infection. *Nat Rev Endocrinol* 16:297–298; doi:10.1038/s41574-020-0353-9.
- Cai W, Ramdas M, Zhu L, Chen X, Striker GE, Vlassara H. 2012. Oral advanced glycation endproducts (AGEs) promote insulin resistance and diabetes by depleting the antioxidant defenses AGE receptor-1 and sirtuin 1. *Proc Natl Acad Sci U S A* 109:15888–15893; doi:10.1073/pnas.1205847109.
- Cipelli R, Harries L, Okuda K, Yoshihara S, Melzer D, Galloway T. 2014. Bisphenol A modulates the metabolic regulator oestrogen-related receptor- $\alpha$  in T-cells. *Reprod Camb Engl* 147:419–426; doi:10.1530/REP-13-0423.
- Conway DE, Sakurai Y, Weiss D, Vega JD, Taylor WR, Jo H, et al. 2009. Expression of CYP1A1 and CYP1B1 in human endothelial cells: regulation by fluid shear stress. *Cardiovasc Res* 81:669–677; doi:10.1093/cvr/cvn360.
- Couleau N, Falla J, Beillerot A, Battaglia E, D'Innocenzo M, Plançon S, et al. 2015. Effects of

394 Endocrine Disruptor Compounds, Alone or in Combination, on Human Macrophage-Like  
395 THP-1 Cell Response. *PloS One* 10:e0131428; doi:10.1371/journal.pone.0131428.  
396 Dalsager L, Christensen N, Husby S, Kyhl H, Nielsen F, Høst A, et al. 2016. Association  
397 between prenatal exposure to perfluorinated compounds and symptoms of infections at age  
398 1-4years among 359 children in the Odense Child Cohort. *Environ Int* 96:58–64;  
399 doi:10.1016/j.envint.2016.08.026.  
400 Drucker DJ. 2020. Coronavirus Infections and Type 2 Diabetes-Shared Pathways with  
401 Therapeutic Implications. *Endocr Rev* 41; doi:10.1210/endrev/bnaa011.  
402 Egaña-Gorroño L, López-Díez R, Yepuri G, Ramirez LS, Reverdatto S, Gugger PF, et al. 2020.  
403 Receptor for Advanced Glycation End Products (RAGE) and Mechanisms and Therapeutic  
404 Opportunities in Diabetes and Cardiovascular Disease: Insights From Human Subjects and  
405 Animal Models. *Front Cardiovasc Med* 7:37; doi:10.3389/fcvm.2020.00037.  
406 Egusquiza RJ, Blumberg B. 2020. Environmental Obesogens and Their Impact on  
407 Susceptibility to Obesity: New Mechanisms and Chemicals. *Endocrinology* 161;  
408 doi:10.1210/endo/bqaa024.  
409 Fabregat A, Jupe S, Matthews L, Sidiropoulos K, Gillespie M, Garapati P, et al. 2018. The  
410 Reactome Pathway Knowledgebase. *Nucleic Acids Res* 46:D649–D655;  
411 doi:10.1093/nar/gkx1132.  
412 Fattorini D, Regoli F. 2020. Role of the chronic air pollution levels in the Covid-19 outbreak  
413 risk in Italy. *Environ Pollut Barking Essex* 1987 264:114732;  
414 doi:10.1016/j.envpol.2020.114732.  
415 Goldberg RB. 2009. Cytokine and cytokine-like inflammation markers, endothelial  
416 dysfunction, and imbalanced coagulation in development of diabetes and its complications. *J*  
417 *Clin Endocrinol Metab* 94:3171–3182; doi:10.1210/jc.2008-2534.  
418 Grandjean P, Andersen EW, Budtz-Jørgensen E, Nielsen F, Mølbak K, Weihe P, et al. 2012.  
419 Serum vaccine antibody concentrations in children exposed to perfluorinated compounds.  
420 *JAMA* 307:391–397; doi:10.1001/jama.2011.2034.  
421 Granum B, Haug LS, Namork E, Stølevik SB, Thomsen C, Aaberge IS, et al. 2013. Pre-natal  
422 exposure to perfluoroalkyl substances may be associated with altered vaccine antibody  
423 levels and immune-related health outcomes in early childhood. *J Immunotoxicol* 10:373–  
424 379; doi:10.3109/1547691X.2012.755580.  
425 Gutiérrez-Vázquez C, Quintana FJ. 2018. Regulation of the Immune Response by the Aryl  
426 Hydrocarbon Receptor. *Immunity* 48:19–33; doi:10.1016/j.immuni.2017.12.012.  
427 Han Z, Miwa Y, Obikane H, Mitsumata M, Takahashi-Yanaga F, Morimoto S, et al. 2008. Aryl  
428 hydrocarbon receptor mediates laminar fluid shear stress-induced CYP1A1 activation and  
429 cell cycle arrest in vascular endothelial cells. *Cardiovasc Res* 77:809–818;  
430 doi:10.1093/cvr/cvm095.  
431 Hartung T, FitzGerald RE, Jennings P, Mirams GR, Peitsch MC, Rostami-Hodjegan A, et al.  
432 2017. Systems Toxicology: Real World Applications and Opportunities. *Chem Res Toxicol*  
433 30:870–882; doi:10.1021/acs.chemrestox.7b00003.  
434 Heilmann C, Grandjean P. Immunotoxicity: Impacts and Research Approaches. In: Kishi R,  
435 Grandjean P, editors. *Health Impacts of Developmental Exposure to Environmental*  
436 *Chemicals*. Singapore: Springer; 2020. pp. 175-90.  
437 Kanehisa M, Sato Y, Furumichi M, Morishima K, Tanabe M. 2019. New approach for  
438 understanding genome variations in KEGG. *Nucleic Acids Res* 47:D590–D595;  
439 doi:10.1093/nar/gky962.  
440 Luft FC. 2016. High-mobility group box 1 protein, angiotensins, ACE2, and target organ

441 damage. *J Mol Med Berl Ger* 94:1–3; doi:10.1007/s00109-015-1372-1.

442 Menini S, Iacobini C, de Latouliere L, Manni I, Ionta V, Blasetti Fantauzzi C, et al. 2018. The  
443 advanced glycation end-product N<sup>ε</sup>-carboxymethyllysine promotes progression of  
444 pancreatic cancer: implications for diabetes-associated risk and its prevention. *J Pathol*  
445 245:197–208; doi:10.1002/path.5072.

446 Mi H, Muruganujan A, Thomas PD. 2013. PANTHER in 2013: modeling the evolution of gene  
447 function, and other gene attributes, in the context of phylogenetic trees. *Nucleic Acids Res*  
448 41:D377–386; doi:10.1093/nar/gks1118.

449 Nie W, Lv Y, Yan L, Chen X, Lv H. 2015. Prediction and Characterisation of the System Effects  
450 of Aristolochic Acid: A Novel Joint Network Analysis towards Therapeutic and Toxicological  
451 Mechanisms. *Sci Rep* 5:17646; doi:10.1038/srep17646.

452 Oczypok EA, Perkins TN, Oury TD. 2017. All the “RAGE” in lung disease: The receptor for  
453 advanced glycation endproducts (RAGE) is a major mediator of pulmonary inflammatory  
454 responses. *Paediatr Respir Rev* 23:40–49; doi:10.1016/j.prrv.2017.03.012.

455 Pacha O, Sallman MA, Evans SE. 2020. COVID-19: a case for inhibiting IL-17? *Nat Rev*  
456 *Immunol* 20:345–346; doi:10.1038/s41577-020-0328-z.

457 Petrilli CM, Jones SA, Yang J, Rajagopalan H, O’Donnell L, Chernyak Y, et al. 2020. Factors  
458 associated with hospital admission and critical illness among 5279 people with coronavirus  
459 disease 2019 in New York City: prospective cohort study. *BMJ* 369:m1966;  
460 doi:10.1136/bmj.m1966.

461 Piñero J, Queralt-Rosinach N, Bravo À, Deu-Pons J, Bauer-Mehren A, Baron M, et al. 2015.  
462 DisGeNET: a discovery platform for the dynamical exploration of human diseases and their  
463 genes. *Database J Biol Databases Curation* 2015:bav028; doi:10.1093/database/bav028.

464 Ravichandran G, Lakshmanan DK, Raju K, Elangovan A, Nambirajan G, Devanesan AA, et al.  
465 2019. Food advanced glycation end products as potential endocrine disruptors: An emerging  
466 threat to contemporary and future generation. *Environ Int* 123:486–500;  
467 doi:10.1016/j.envint.2018.12.032.

468 Rojas A, Gonzalez I, Morales MA. 2020. SARS-CoV-2-mediated inflammatory response in  
469 lungs: should we look at RAGE? *Inflamm Res Off J Eur Histamine Res Soc Al* 69:641–643;  
470 doi:10.1007/s00011-020-01353-x.

471 Safran M, Dalah I, Alexander J, Rosen N, Iny Stein T, Shmoish M, et al. 2010. GeneCards  
472 Version 3: the human gene integrator. *Database J Biol Databases Curation* 2010:baq020;  
473 doi:10.1093/database/baq020.

474 Slenter DN, Kutmon M, Hanspers K, Riutta A, Windsor J, Nunes N, et al. 2018. WikiPathways:  
475 a multifaceted pathway database bridging metabolomics to other omics research. *Nucleic*  
476 *Acids Res* 46:D661–D667; doi:10.1093/nar/gkx1064.

477 Song J, Hu B, Qu H, Wang L, Huang X, Li M, et al. 2020. Upregulation of angiotensin  
478 converting enzyme 2 by shear stress reduced inflammation and proliferation in vascular  
479 endothelial cells. *Biochem Biophys Res Commun* 525:812–818;  
480 doi:10.1016/j.bbrc.2020.02.151.

481 Stefan N, Birkenfeld AL, Schulze MB, Ludwig DS. 2020. Obesity and impaired metabolic  
482 health in patients with COVID-19. *Nat Rev Endocrinol*; doi:10.1038/s41574-020-0364-6.

483 Taboureau O, Audouze K. 2017. Human Environmental Disease Network: A computational  
484 model to assess toxicology of contaminants. *ALTEX* 34:289–300;  
485 doi:10.14573/altex.1607201.

486 Trasande L, Zoeller RT, Hass U, Kortenkamp A, Grandjean P, Myers JP, et al. 2016. Burden of  
487 disease and costs of exposure to endocrine disrupting chemicals in the European Union: an



updated analysis. *Andrology* 4:565–572; doi:10.1111/andr.12178.

Tsatsakis A, Petrakis D, Nikolouzakakis TK, Docea AO, Calina D, Vinceti M, et al. 2020. COVID-19, an opportunity to reevaluate the correlation between long-term effects of anthropogenic pollutants on viral epidemic/pandemic events and prevalence. *Food Chem Toxicol Int J Publ Br Ind Biol Res Assoc* 141:111418; doi:10.1016/j.fct.2020.111418.

Vandenberg LN, Ågerstrand M, Beronius A, Beausoleil C, Bergman Å, Bero LA, et al. 2016. A proposed framework for the systematic review and integrated assessment (SYRINA) of endocrine disrupting chemicals. *Environ Health Glob Access Sci Source* 15:74; doi:10.1186/s12940-016-0156-6.

Veldhoen M, Hirota K, Westendorf AM, Buer J, Dumoutier L, Renauld J-C, et al. 2008. The aryl hydrocarbon receptor links TH17-cell-mediated autoimmunity to environmental toxins. *Nature* 453:106–109; doi:10.1038/nature06881.

Vermeulen R, Schymanski EL, Barabási A-L, Miller GW. 2020. The exposome and health: Where chemistry meets biology. *Science* 367:392–396; doi:10.1126/science.aay3164.

Williams AJ, Grulke CM, Edwards J, McEachran AD, Mansouri K, Baker NC, et al. 2017. The CompTox Chemistry Dashboard: a community data resource for environmental chemistry. *J Cheminformatics* 9:61; doi:10.1186/s13321-017-0247-6.

Wu Q, Achebouché R, Audouze K. 2020. Computational systems biology as an animal-free approach to characterize toxicological effects of persistent organic pollutants. *ALTEX* 37:287–299; doi:10.14573/altex.1910161.

Zhou F, Yu T, Du R, Fan G, Liu Y, Liu Z, et al. 2020. Clinical course and risk factors for mortality of adult inpatients with COVID-19 in Wuhan, China: a retrospective cohort study. *Lancet Lond Engl* 395:1054–1062; doi:10.1016/S0140-6736(20)30566-3.

Zhu Y, Xie J, Huang F, Cao L. 2020. Association between short-term exposure to air pollution and COVID-19 infection: Evidence from China. *Sci Total Environ* 727:138704; doi:10.1016/j.scitotenv.2020.138704.

## 517 Tables

518

### 519 Table 1. List of the 34 major substances known or suspected to be endocrine-disrupting

520 chemicals.

| CAS         | chemical.name                     | abbreviation | CAS         | chemical.name            | abbreviation |
|-------------|-----------------------------------|--------------|-------------|--------------------------|--------------|
| 35065-27-1  | 2,2',4,4',5,5'-Hexachlorobiphenyl | PCB-153      | 446-72-0    | genistein                | -            |
| 1746-01-6   | 2,3,7,8- Tetrachlorodibenzodioxin | TCDD         | 3194-55-6   | hexabromocyclododecane   | HBCD         |
| 1912-24-9   | atrazine                          | -            | 118-74-1    | Hexachlorobenzene        | HCB          |
| 131-56-6    | benzophenone-1                    | -            | 138261-41-3 | imidacloprid             | -            |
| 117-81-7    | Bis (2-ethylhexyl)phthalate       | DEHP         | 625-45-6    | methoxyacetic acid       | MAA          |
| 620-92-8    | bisohenol F                       | BPF          | 99-76-3     | methyl-paraben           | MEPA         |
| 80-05-7     | bisphenol A                       | BPA          | 68412-53-3  | nonylphenol ethoxylate   | NPEO         |
| 80-09-1     | bisphenol S                       | BPS          | 103-90-2    | acetaminophen            | -            |
| 94-26-8     | butyl-paraben                     | BUPA         | 68631-49-2  | PBDE-153                 | PBDE-153     |
| 57-74-9     | Chlordane                         | -            | 5436-43-1   | PBDE-47                  | PBDE-47      |
| 2921-88-2   | chlorpyrifos                      | CPF          | 14797-73-0  | perchlorate              | -            |
|             |                                   |              |             | Perfluorooctane sulfonic |              |
| 210880-92-5 | Clothianidin                      | -            | 1763-23-1   | acid                     | PFOS         |
| 52315-07-8  | cypermethrin                      | -            | 335-67-1    | Perfluorooctanoic acid   | PFOA         |
| 486-66-8    | daidzein                          | -            | 67747-09-5  | prochloraz               | -            |
| 84-74-2     | Dibutyl phthalate                 | DBP          | 153719-23-4 | thiamethoxam             | -            |
| 72-55-9     | Dichlorodiphenyldichloroethylene  | DDE          | 688-73-3    | Tributyltin              | TBT          |
| 50-29-3     | dichlorodiphenyltrichloroethane   | DDT          | 3380-34-5   | triclosan                | -            |

521

### 522 Table 2. List of the 13 diseases.

|                                 |                         |
|---------------------------------|-------------------------|
| Obesity                         |                         |
| Impaired respiratory mechanisms | respiratory dysfunction |
| Increased airway resistance     | respiratory dysfunction |
| Impaired gas exchange           | respiratory dysfunction |
| Low lung volume                 | respiratory dysfunction |
| Low muscle strength             | respiratory dysfunction |
| Cardiovascular disease          | comorbidities           |
| Diabetes mellitus               | comorbidities           |
| Kidney disease                  | comorbidities           |
| Hypertension                    | metabolic risk          |
| Prediabetes                     | metabolic risk          |

523

| Data sources | Name of pathways                                                               | Proteins* | P-value  | FDR**    |
|--------------|--------------------------------------------------------------------------------|-----------|----------|----------|
| KEGG         | AGE-RAGE signaling pathway in diabetic complications                           | 22        | < E-16   | < E-16   |
| KEGG         | Fluid shear stress and atherosclerosis                                         | 20        | 2.22E-16 | 1.81E-14 |
| KEGG         | TNF signaling pathway                                                          | 18        | 8.8E-16  | 5.79E-14 |
| KEGG         | Insulin resistance                                                             | 17        | 1.04E-14 | 5.67E-13 |
| KEGG         | Endocrine resistance                                                           | 15        | 7.81E-13 | 2.40E-11 |
| KEGG         | MAPK signaling pathway                                                         | 23        | 8.84E-13 | 2.40E-11 |
| KEGG         | HIF-1 signaling pathway                                                        | 15        | 1.06E-12 | 2.66E-11 |
| KEGG         | Non-alcoholic fatty liver disease (NAFLD)                                      | 17        | 2.83E-12 | 5.77E-11 |
| KEGG         | FoxO signaling pathway                                                         | 16        | 5.17E-12 | 9.36E-11 |
| KEGG         | IL-17 signaling pathway                                                        | 14        | 6.11E-12 | 1.05E-10 |
| KEGG         | EGFR tyrosine kinase inhibitor resistance                                      | 13        | 1.14E-11 | 1.85E-10 |
| KEGG         | PI3K-Akt signaling pathway                                                     | 23        | 3.88E-11 | 5.51E-10 |
| KEGG         | Prolactin signaling pathway                                                    | 12        | 4.50E-11 | 6.12E-10 |
| KEGG         | Ras signaling pathway                                                          | 19        | 4.91E-11 | 6.40E-10 |
| KEGG         | Thyroid hormone signaling pathway                                              | 14        | 1.32E-10 | 1.39E-09 |
| KEGG         | Toll-like receptor signaling pathway                                           | 13        | 4.08E-10 | 3.91E-09 |
| KEGG         | Insulin signaling pathway                                                      | 14        | 1.25E-09 | 1.07E-08 |
| KEGG         | Human T-cell leukemia virus 1 infection                                        | 18        | 1.93E-09 | 1.57E-08 |
| KEGG         | Chronic myeloid leukemia                                                       | 11        | 2.02E-09 | 1.58E-08 |
| KEGG         | B cell receptor signaling pathway                                              | 10        | 1.50E-08 | 1.09E-07 |
| KEGG         | T cell receptor signaling pathway                                              | 11        | 4.34E-08 | 3.01E-07 |
| KEGG         | C-type lectin receptor signaling pathway                                       | 11        | 5.90E-08 | 4.01E-07 |
| Panther      | Interleukin signaling pathway                                                  | 12        | 1.94E-07 | 1.10E-05 |
| Panther      | Insulin/IGF pathway-protein kinase B signaling cascade                         | 7         | 1.51E-05 | 3.42E-04 |
| Panther      | Ras Pathway                                                                    | 9         | 3.61E-05 | 6.80E-04 |
| Panther      | T cell activation                                                              | 9         | 6.34E-05 | 8.95E-04 |
| Panther      | PI3 kinase pathway                                                             | 7         | 1.12E-04 | 0.0012   |
| Panther      | Insulin/IGF pathway-mitogen activated protein kinase kinase/MAP kinase cascade | 5         | 5.81E-04 | 0.0050   |
| Panther      | Inflammation mediated by chemokine and cytokine signaling pathway              | 13        | 8.29E-04 | 0.0062   |
| Panther      | B cell activation                                                              | 6         | 0.0026   | 0.0154   |
| Panther      | FGF signaling pathway                                                          | 8         | 0.0034   | 0.0183   |
| Panther      | EGF receptor signaling pathway                                                 | 8         | 0.0063   | 0.0324   |
| Panther      | Interferon-gamma signaling pathway                                             | 2         | 0.1423   | 0.5544   |

|              |                                                                   |    |          |          |
|--------------|-------------------------------------------------------------------|----|----------|----------|
| Panther      | JAK/STAT signaling pathway                                        | 1  | 0.3137   | 0.9401   |
| Panther      | Toll receptor signaling pathway                                   | 2  | 0.3521   | 0.9947   |
| Reactome     | Signaling by Interleukins                                         | 31 | < E-16   | < E-16   |
| Reactome     | Interleukin-4 and Interleukin-13 signaling                        | 21 | < E-16   | < E-16   |
| Reactome     | Cytokine Signaling in Immune system                               | 33 | 5.55E-16 | 3.20E-13 |
| Reactome     | Interleukin-10 signaling                                          | 10 | 1.05E-11 | 2.85E-09 |
| Reactome     | Negative regulation of the PI3K/AKT network                       | 13 | 1.16E-11 | 2.85E-09 |
| Reactome     | PIP3 activates AKT signaling                                      | 18 | 1.83E-11 | 3.51E-09 |
| Reactome     | PI3K/AKT Signaling in Cancer                                      | 12 | 6.79E-11 | 1.17E-08 |
| Reactome     | Cytochrome P450 - arranged by substrate type                      | 10 | 3.70E-10 | 5.81E-08 |
| Reactome     | PI5P, PP2A and IER3 Regulate PI3K/AKT Signaling                   | 11 | 1.43E-09 | 2.07E-07 |
| Reactome     | Signaling by Receptor Tyrosine Kinases                            | 19 | 2.43E-08 | 2.70E-06 |
| Reactome     | Insulin receptor signalling cascade                               | 8  | 2.79E-08 | 2.84E-06 |
| Reactome     | Signaling by Insulin receptor                                     | 8  | 5.25E-07 | 3.27E-05 |
| Reactome     | MAPK family signaling cascades                                    | 13 | 2.57E-06 | 1.14E-04 |
| Reactome     | Constitutive Signaling by Aberrant PI3K in Cancer                 | 7  | 3.66E-06 | 1.58E-04 |
| Reactome     | Immune System                                                     | 37 | 7.14E-06 | 2.94E-04 |
| Wiki-pathway | Netrin-UNC5B signaling Pathway                                    | 15 | 2.22E-16 | 1.18E-13 |
| Wiki-pathway | Nonalcoholic fatty liver disease                                  | 20 | 3.06E-14 | 2.71E-12 |
| Wiki-pathway | Aryl Hydrocarbon Receptor Netpath                                 | 12 | 1.32E-12 | 6.36E-11 |
| Wiki-pathway | AGE/RAGE pathway                                                  | 13 | 3.93E-12 | 1.61E-10 |
| Wiki-pathway | Insulin Signaling                                                 | 18 | 5.35E-12 | 2.03E-10 |
| Wiki-pathway | RAC1/PAK1/p38/MMP2 Pathway                                        | 13 | 7.18E-12 | 2.38E-10 |
| Wiki-pathway | Relationship between inflammation, COX-2 and EGFR                 | 9  | 2.42E-11 | 7.32E-10 |
| Wiki-pathway | IL-3 Signaling Pathway                                            | 11 | 4.31E-11 | 1.09E-09 |
| Wiki-pathway | Ras Signaling                                                     | 18 | 5.70E-11 | 1.38E-09 |
| Wiki-pathway | IL-5 Signaling Pathway                                            | 10 | 1.09E-10 | 2.52E-09 |
| Wiki-pathway | PI3K-Akt Signaling Pathway                                        | 23 | 2.10E-10 | 4.13E-09 |
| Wiki-pathway | Aryl Hydrocarbon Receptor Pathway                                 | 10 | 7.67E-10 | 1.13E-08 |
| Wiki-pathway | IL-18 signaling pathway                                           | 20 | 1.09E-09 | 1.49E-08 |
| Wiki-pathway | Cells and Molecules involved in local acute inflammatory response | 7  | 1.48E-09 | 1.91E-08 |
| Wiki-pathway | Toll-like Receptor Signaling Pathway                              | 13 | 1.52E-09 | 1.93E-08 |

\*number of proteins from the studied set that is involved in a pathway

\*\* false discovery rate

## Figure captions

**Figure 1. Overview of the integrative systems toxicology approach.** **A:** Human proteins known to be dysregulated by endocrine-disrupting chemicals (EDCs) were extracted from the CompTox database; human proteins linked to obesity or to comorbidities or metabolic dysfunction known to be associated with obesity were compiled using DisGeNET and GeneCards. These compiled data were used to develop a tripartite network. **B:** A set of proteins was identified that was common to both association studies (proteins targeted by the EDCs and also involved in comorbidities). **C:** Biological enrichment was performed for pathways for each of the four databases, by over-representation analysis (ORA) to identify potential mechanisms of action related to these proteins, where the biological pathways were ranked by their statistical significance. **D:** The most relevant of the potential pathways were compared to known COVID-19 dysregulated pathways from the literature and the AOP-Wiki database.

**Figure 2. Tripartite network representation of endocrine-disrupting chemicals-proteins-diseases relationships.** First, a bipartite network of the 208 human proteins known to be dysregulated by the 30 endocrine-disrupting chemicals (EDCs) was created as extracted from the CompTox database. Each yellow diamond node represents an EDC, and edges are the interactions between EDCs and proteins. Then, a second bipartite network was generated for the 4184 human proteins known to be linked to the 13 predisposing diseases, as extracted from the DisGeNET (3262 links) and GeneCards (2079 links) databases. Each red square node represents a disease, and edges are the interactions between diseases and proteins. A total of 1156 proteins were overlapping. All proteins were grouped using the Panther classification system (version 15) and are represented by circles (colors are according to their Panther family classes).

data

- Endocrine disrupting chemicals ●
- Diseases ●
- Proteins ●

*CompTox, DisGeNET, GeneCards*

A

- EDC-protein associations
- Disease-protein associations

B

- Set of proteins shared by the association studies

C

- Statistical significance of biological pathways

*KEGG, Reactome, Wiki pathways, Panther*

D

- COVID-19 and biological mechanisms

*Literature, AOP-Wiki*

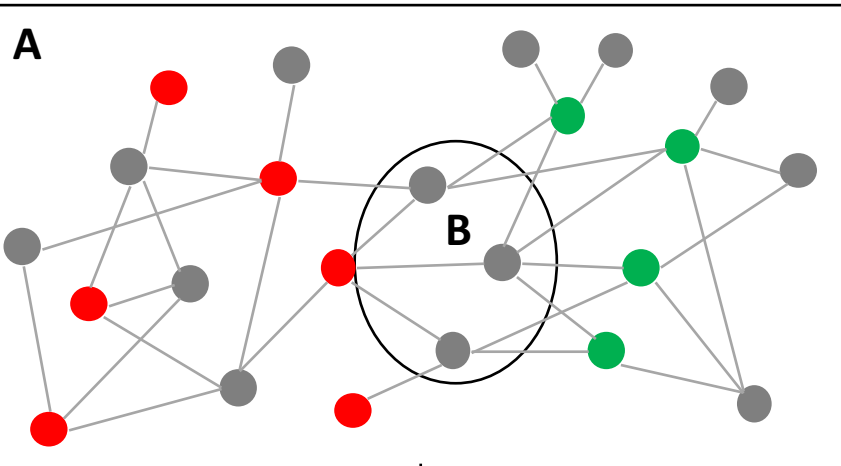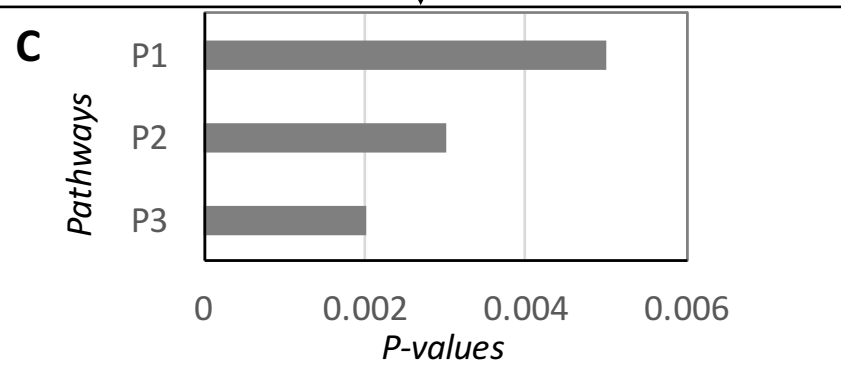

EDCs  $\xrightarrow{?}$  COVID-19

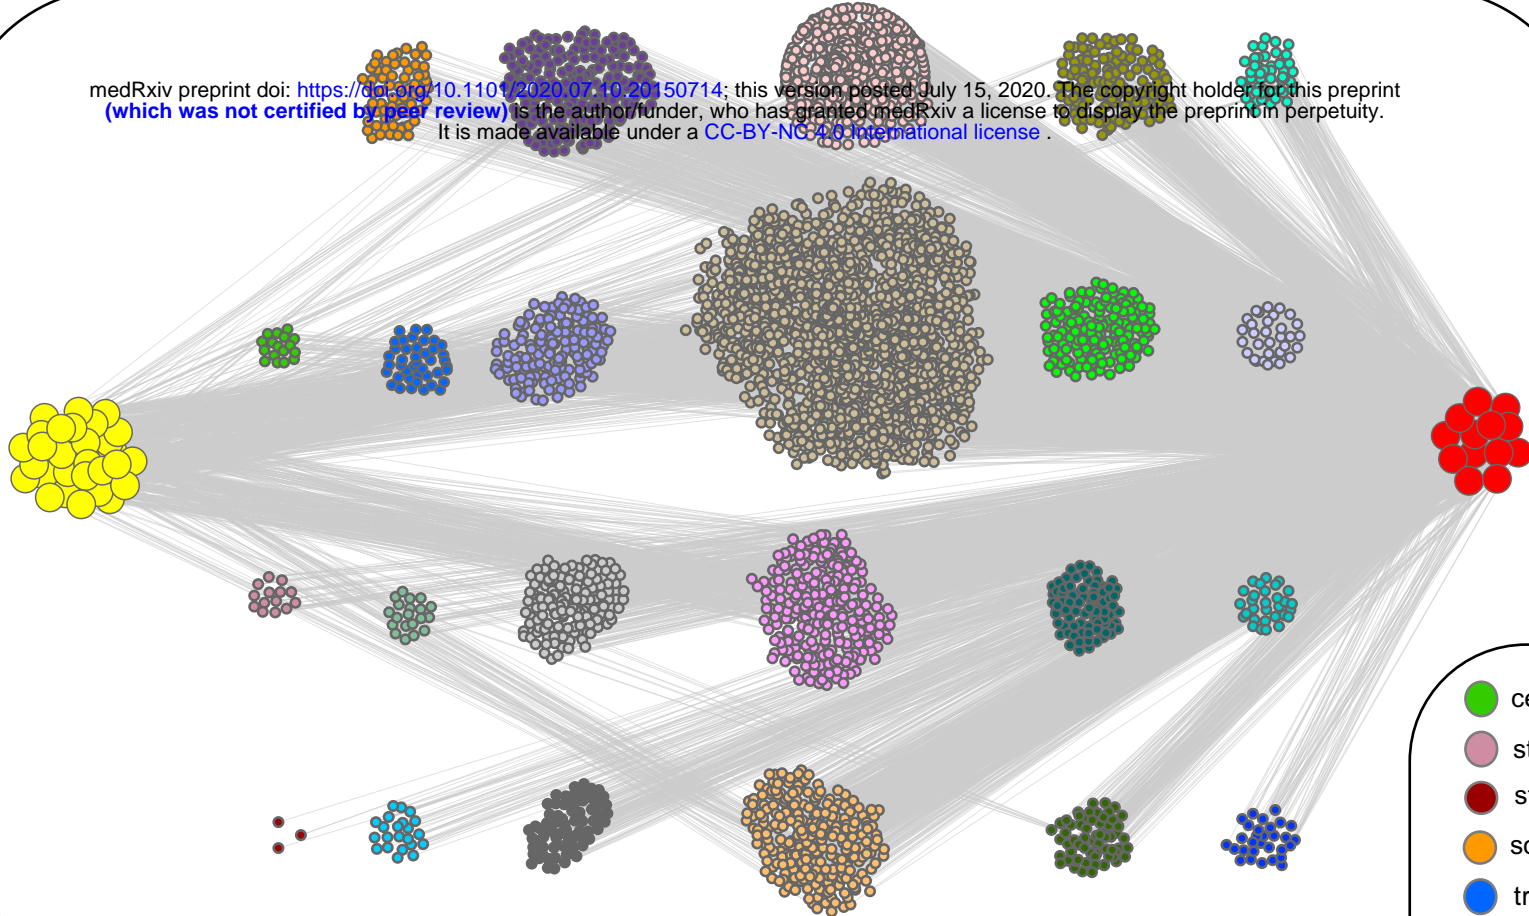

- |                                   |                                                   |
|-----------------------------------|---------------------------------------------------|
| cell junction protein             | gene-specific transcriptional regulator           |
| structural protein                | protein modifying enzyme                          |
| storage protein                   | protein-binding activity modulator                |
| scaffold/adaptor protein          | intercellular signal molecule                     |
| translational protein             | cytoskeletal protein                              |
| chaperone                         | extracellular matrix protein                      |
| calcium-binding protein           | defense/immunity protein                          |
| transporter                       | transfer/carrier protein                          |
| transmembrane signal receptor     | cell adhesion molecule                            |
| nucleic acid binding protein      | chromatin/chromatin-binding or regulatory protein |
| membrane traffic protein          | endocrine disrupting chemicals                    |
| metabolite interconversion enzyme | diseases                                          |
| uncategorized protein class       |                                                   |
